# Supplementary material for: Superior PM2.5 Estimation by Integrating Aerosol Fine Mode Data from the Himawari-8 Satellite in Deep and Classical Machine Learning Models
Source: MDPI journal article supplement (doi:10.3390/rs13142779), 2021-07-15
Supplement: s1 [file s1]

Article

# Superior PM<sub>2.5</sub> Estimation by Integrating Aerosol Fine Mode Data from the Himawari-8 Satellite in Deep and Classical Machine Learning Models

Zhou Zang <sup>1</sup>, Dan Li <sup>1</sup>, Yushan Guo <sup>1</sup>, Wenzhong Shi <sup>2</sup> and Xing Yan <sup>1,\*</sup>

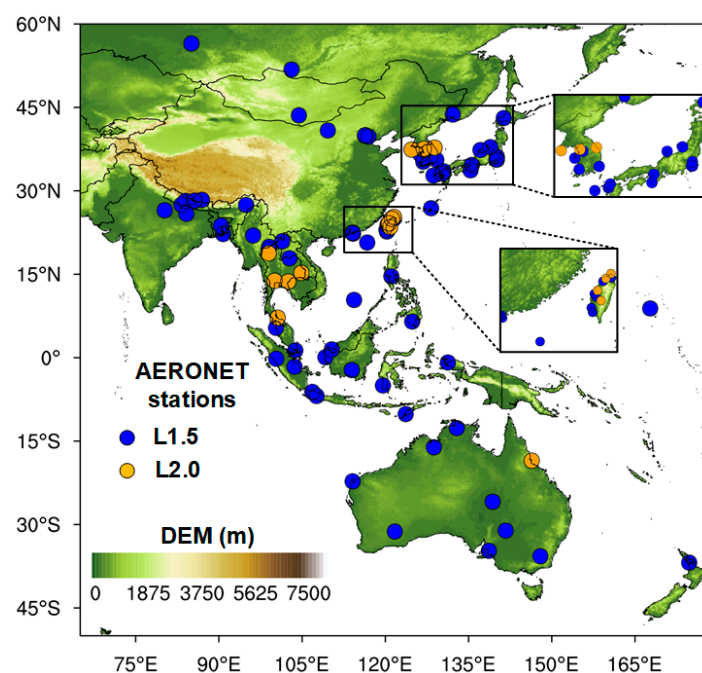

**Figure S1.** Map of Himawari-8/AHI imaging zone with the base map showing the DEM in meters. Blue and orange dots represent Level 1.5 (L1.5) and Level 2.0 (L2.0) AERONET stations that were used in validation, respectively.

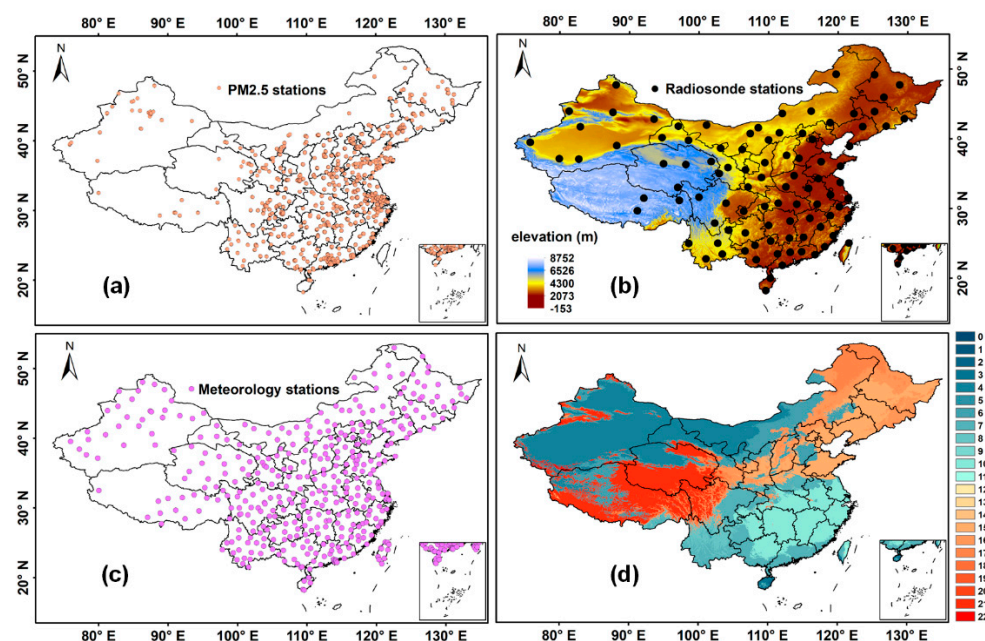

**Figure S2.** The study area (China) for PM<sub>2.5</sub> estimation and the ground-level stations of a) 1701 PM<sub>2.5</sub> stations (pink scatters), b) 95 radiosonde stations (black scatters) and the DEM over China,

c) 405 meteorology stations (magenta scatters) and d) climate zones over China classified by Koppen-Geiger climate classifications. A detailed description of the legend is shown in Table S3.

Figure S3a and S3b shows the differences in the R and RMSE values (by the V3.0 result minus the V2.0 result) for AE. This indicates that R is increased at 70.5% of stations, and RMSE is increased at 100% of stations. Stations over northern China and Japan show a particular increase in R of over 0.1 and a decrease in RMSE of over 0.2. After quality control, more stations showed increased R values (73.8%), but some stations over south-eastern Asia showed increased RMSE values ranging from 0 to 0.36. However, according to the R and RMSE values stations for V3.0 and V2.1 with AE and AE QA (Figure S4), both the V3.0 AE and V3.0 AE QA data outperformed the V2.1 data, and more stations showed high R values ( $> 0.15$ ) and low RMSE values ( $< 0.40$ ). This result reveals that both before and after quality control, V3.0 AE always performed better than V2.1 AE.

With respect to V3.0 and V2.1 FMF, Figure 3e and 3f show that although R was decreased at many stations over southeastern Asia, South Korea, and northern China, the RMSE was much lower at most stations (95.1%) with V3.0 FMF. As shown in Figure S5, both V2.1 and V3.0 FMF were high R ( $> 0.20$ ) in northern China and Japan, and the RMSE of V3.0 FMF was particularly low ( $< 0.20$ ). This result illustrates that the results of V3.0 FMF are generally better than V2.0 FMF over sites.

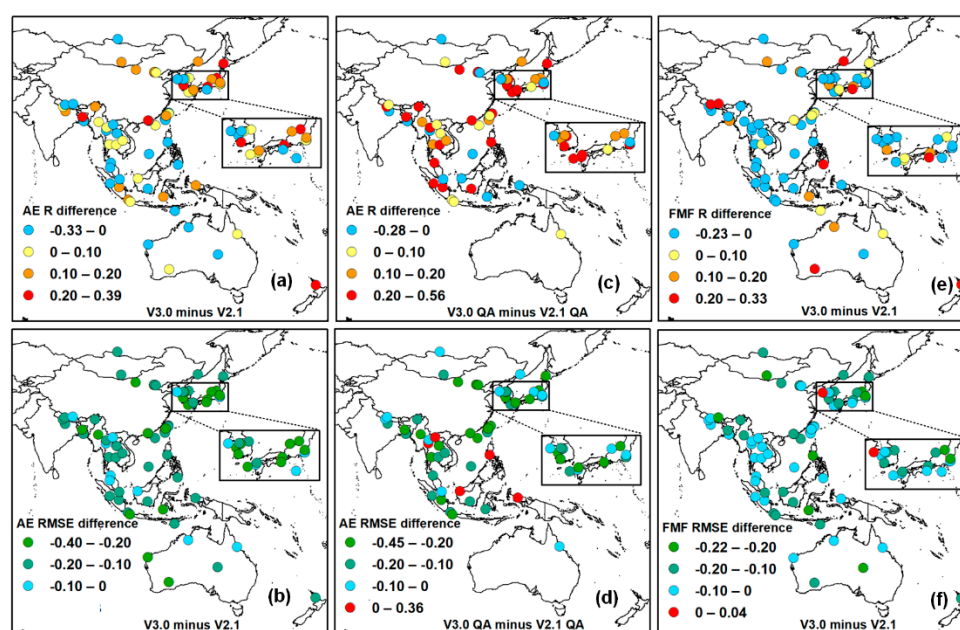

**Figure S3.** Differences between validation results (R and RMSE) for Himwari-8 V3.0 and V2.1 (V3.0 minus V2.1) data over AERONET sites: (a, b) for AE; (c, d) for AE after quality control (AE QA); and (e, f) for FMF.

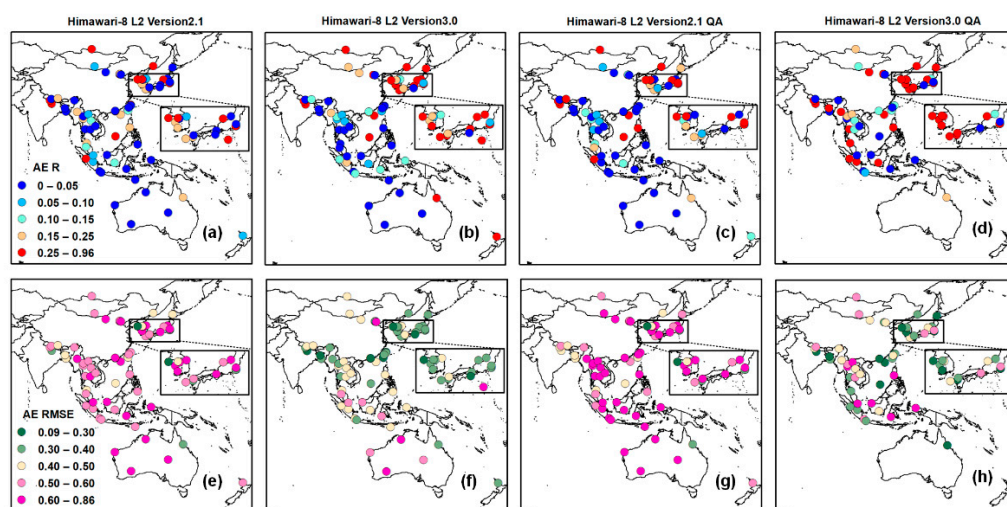

**Figure S4.** Validation results (R and RMSE) for Himawari-8 V3.0 and V2.1 AE over AEROENT sites: (a, e) for V2.1 AE; (b, f) for V3.0 AE; (c, g) for V2.1 AE QA; (d, h) for V3.0 AE QA.

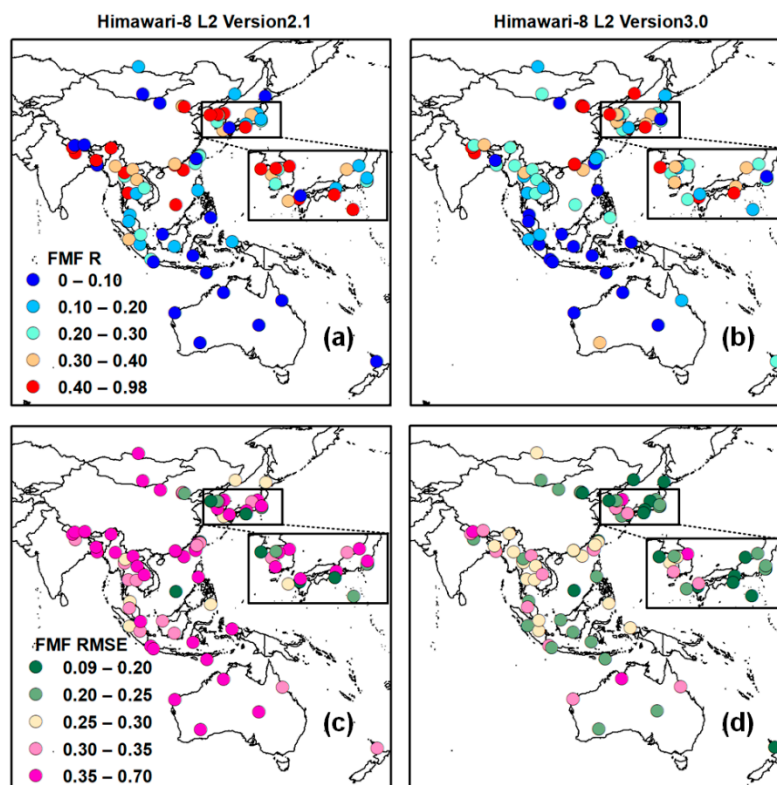

**Figure S5.** Validation results (R and RMSE) for Himawari-8 V3.0 and V2.1 FMF over AEROENT sites: (a, c) for V2.1 FMF; (b, d) for V3.0 FMF.

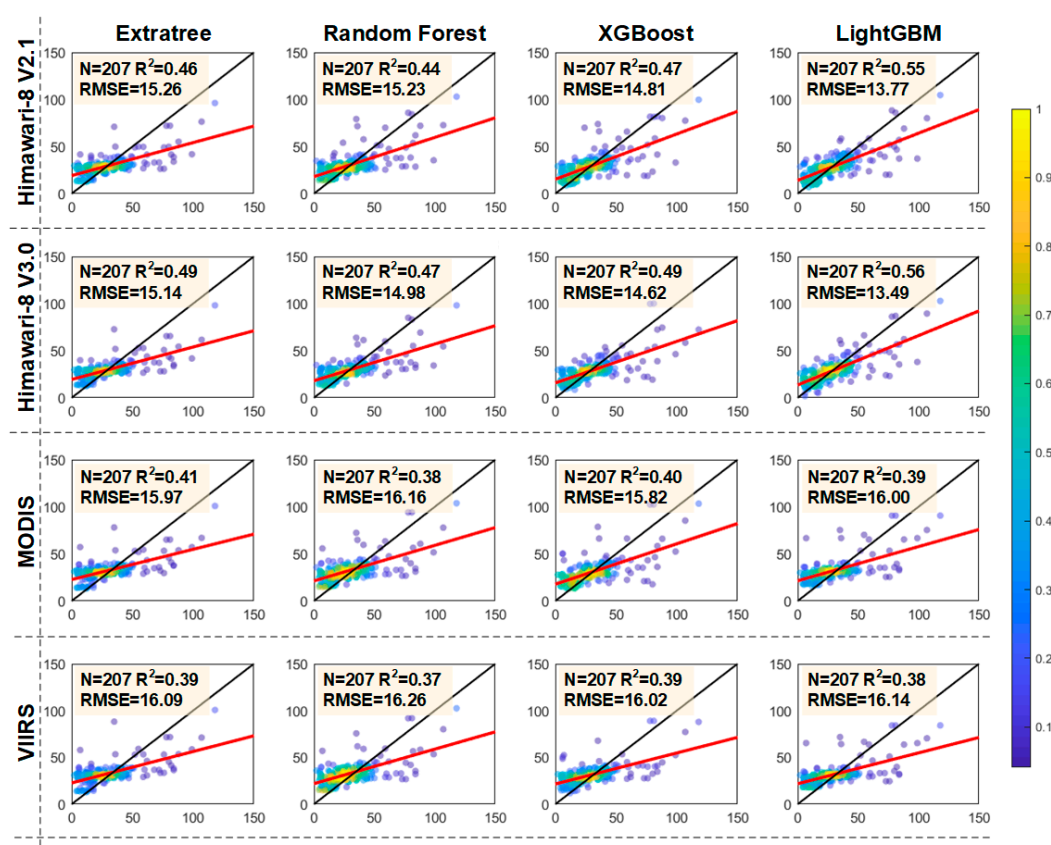

**Figure S6.** Density scatter plots of modeling results of ground-based  $PM_{2.5}$  retrieved by four machine learning models (Extratree, Random Forest, LightGBM and XGBoost) based on four different FMF products (Himawari-8 V2.1 and V3.0 FMF, MODIS and VIIRS FMF) with the same lengths for training and test datasets. The black and red lines represent 1:1 and fitting lines, respectively. Because the amount of training data is small ( $N=1321$ ), which is unsuitable for applying deep learning models, EntityDenseNet was not used for  $PM_{2.5}$  estimations here.

**Table S1.** Previous studies of machine learning retrieved  $PM_{2.5}$  since 2014.

| Author          | Region                    | Models                                                                                                 | AOT | Aerosol size information |
|-----------------|---------------------------|--------------------------------------------------------------------------------------------------------|-----|--------------------------|
| Chen et al. [1] | China                     | Random forest (RF), self-adaptive deep neural network (DNN)                                            | Yes | No                       |
| Chen et al. [2] | Yangtze River Delta (YRD) | RF, Gradient Boosting Regression (GBR), K-nearest neighbor (KNN) regression                            | Yes | No                       |
| Chen et al. [3] | China                     | A stacking model based on AdaBoost, XGBoost, RF                                                        | Yes | No                       |
| Chen et al. [4] | United states             | A two-stage model based on a multiple regression model (MRM) and an aerosol classification model (ACM) | Yes | No                       |
| Chen et al. [5] | Shenzhen                  | Linear regression (LR), geographically and temporally weighted regression (GTWR), RF, improved RF      | Yes | No                       |
| Chen et al. [6] | China                     | RF, XGBoost, support vector machine (SVM), gradient boost                                              | Yes | No                       |

|                        |                             |                                                                                                                                                                                                                                                              |     |    |
|------------------------|-----------------------------|--------------------------------------------------------------------------------------------------------------------------------------------------------------------------------------------------------------------------------------------------------------|-----|----|
|                        |                             | model (GBM), generalized additive model (GAM), Bayesian regularized neural network (BRNN), least absolute shrinkage and selection operator (LASSO)                                                                                                           |     |    |
| Chu and Bilal [7]      | Taiwan                      | Integrated GTWR, RANdom SAmple Consensus (RANSAC)                                                                                                                                                                                                            | Yes | No |
| Di et al. [8]          | United states               | Ensemble model integrating GBM, RF and Neural Network (NN)                                                                                                                                                                                                   | Yes | No |
| Dong et al. [9]        | China                       | RF, back propagation algorithm (BPNN)                                                                                                                                                                                                                        | Yes | No |
| Fan et al. [10]        | Beijing                     | XGBoost, Geographically Weighted Regression (GWR), Spatially Local XGBoost (SL-XGB)                                                                                                                                                                          | Yes | No |
| Fang et al. [11]       | China                       | Timely structure adaptive modeling (TSAM)                                                                                                                                                                                                                    | Yes | No |
| Feng et al. [12]       | China                       | A ST-stacking model that combined XGBoost, k-nearest neighbour (KNN), BPNN in level 1 and LR for integration in level 2                                                                                                                                      | Yes | No |
| Fu et al. [13]         | Beijing                     | Mixed-effect (ME) model                                                                                                                                                                                                                                      | Yes | No |
| Guo et al. [14]        | China                       | RF                                                                                                                                                                                                                                                           | Yes | No |
| Han and Tong [15]      | Chengdu                     | Improved linear mixed effect (LME) model                                                                                                                                                                                                                     | Yes | No |
| Han et al. [16]        | Beijing                     | LME model                                                                                                                                                                                                                                                    | Yes | No |
| He and Christakos [17] | Beijing-Tianjin-Hebei (BTH) | A synthetic modeling framework based on the integration of (a) the Bayesian maximum entropy method that assimilates auxiliary information from land-use regression (LUR) and artificial neural network (ANN) model and (b) a space-time projection technique | Yes | No |
| Hu et al. [18]         | East China                  | Spatiotemporal regression kriging (STRK) model                                                                                                                                                                                                               | Yes | No |
| Huang et al. [19]      | Hebei                       | LME model                                                                                                                                                                                                                                                    | Yes | No |
| Hung et al. [20]       | New York State              | Multiple linear regression (MLR), ANN                                                                                                                                                                                                                        | Yes | No |
| Imani [21]             | Tehran                      | Proposed DNN                                                                                                                                                                                                                                                 | Yes | No |
| Jiang et al. [22]      | China                       | Two-stage RF                                                                                                                                                                                                                                                 | Yes | No |
| Jung et al. [23]       | Tehran                      | A proposed DNN                                                                                                                                                                                                                                               | Yes | No |
| Kianian et al. [24]    | United states               | Lattice kriging, RF                                                                                                                                                                                                                                          | Yes | No |
| Kim et al. [25]        | Seoul                       | MLR                                                                                                                                                                                                                                                          | Yes | No |
| Knibbs et al. [26]     | Australia                   | LUR                                                                                                                                                                                                                                                          | Yes | No |



|                    |                                                              |                                                                              |                       |    |
|--------------------|--------------------------------------------------------------|------------------------------------------------------------------------------|-----------------------|----|
| Kow et al. [27]    | Taiwan                                                       | CNN-BP engaging a Convolutional Neural Network (CNN) and BPNN                | Yes                   | No |
| Lee et al. [28]    | California                                                   | LUR                                                                          | Yes                   | No |
| Li et al. [29]     | Iraq and Kuwait                                              | A 4-stage model based on RF, GAM, ME                                         | Yes                   | No |
| Li et al. [30]     | China                                                        | Space-time random forest (STRF)                                              | Yes                   | No |
| Li et al. [31]     | California                                                   | An autoencoder-based full residual deep network                              | Yes                   | No |
| Li [32]            | BTH                                                          | bootstrap aggregating (bagging) of autoencoder-based residual deep networks, | Yes                   | No |
| Li et al. [33]     | Shandong                                                     | Constrained mixed-effect bagging model                                       | Yes                   | No |
| Li et al. [34]     | Eastern mainland China                                       | Three-step residual variance constraint method (RVCM)                        | yes                   | No |
| Li et al. [35]     | China                                                        | Geographically and temporally weighted neural network (GTWNN)                | Yes                   | No |
| Li et al. [36]     | China                                                        | Spatialtemporally correlated deep belief network (Geoi-DBN)                  | Yes                   | No |
| Li and Zhang [37]  | BTH                                                          | RSRF that integrates RF and AOD                                              | Yes                   | No |
| Li et al. [38]     | Three roadside stations in Hong kong                         | RF, Boost Regression Trees (BRT), SVM, XGBoost, GAM, Cubist                  | Yes                   | No |
| Liang et al. [39]  | China                                                        |                                                                              | Yes                   | No |
| Liu et al. [40]    | China                                                        | Ensemble ML                                                                  | No, using TOA instead | No |
| Lu et al. [41]     | China                                                        | RF                                                                           | Yes                   | No |
| Luo et al. [42]    | Typical regions in China                                     | A hybrid model based on BPNN and e-support vector regression (e-SVR)         | Yes                   | No |
| Lv et al. [43]     | BTH                                                          |                                                                              | Yes                   | No |
| Lyu et al. [44]    | China                                                        | General linear model, fully connected NN, RD, GBM                            | Yes                   | No |
| Ma et al. [45]     | Guangdong                                                    | Transferred bi-directional long short-term memory (TL-BLSTM)                 | Yes                   | No |
| Ma et al. [46]     | YRD                                                          | LME                                                                          | Yes                   | No |
| Nabavi et al. [47] | Tehran                                                       | RF, GBM, SVM, Multivariate Adaptive Regression Splines (MARS)                | Yes                   | No |
| Nguyen et al. [48] | Vietnam                                                      | Statistically-significant regression model                                   | Yes                   | No |
| Ni et al. [49]     | BTH                                                          | BPNN                                                                         | Yes                   | No |
| Park et al. [50]   | Full coverage of the Geostationary Ocean Color Imager (GOCI) | RF                                                                           | yes                   | No |

|                           |                                       |                                                                                                                                                                                                                          |                       |    |
|---------------------------|---------------------------------------|--------------------------------------------------------------------------------------------------------------------------------------------------------------------------------------------------------------------------|-----------------------|----|
| Park et al. [51]          | South Korea                           | RF                                                                                                                                                                                                                       | Yes                   | No |
| Park et al. [52]          | United States                         | CNN                                                                                                                                                                                                                      | Yes                   | No |
| Pu and Yoo [53]           | New York state                        | Multistage model based on GBM, quantile regression forests (QRF), RF, GBM, feed-forward DNN                                                                                                                              | Yes                   | No |
| Ren et al. [54]           | United States                         | LM, Ridge Regression, LASSO, Elastic Net Regularization (ELASTICNET), Principal Component Regression model (PCR), Partial Least Squares Regression model (PLSR), KNN, SVR, BPNN, DNN, Regression Trees (RT), RF, XGBoost | Yes                   | No |
| Schneider et al. [55]     | Great Britain                         | A multi-stage satellite-based machine learning model based on RF                                                                                                                                                         | Yes                   | No |
| Song et al. [56]          | Pearl River Delta (PRD)               | GWR                                                                                                                                                                                                                      | Yes                   | No |
| Stafoggia et al. [57]     | Italy                                 | A five-stage machine-learning approach based on RF                                                                                                                                                                       | Yes                   | No |
| Sun et al. [58]           | BTH                                   | DNN                                                                                                                                                                                                                      | Yes                   | No |
| Tang et al. [59]          | YRD                                   | A two-stage RF                                                                                                                                                                                                           | Yes                   | No |
| Tian et al. [60]          | PRD                                   | BPNN, Elman Neural Network (ENN), RF, Gradient Boosting Regression Tree (GBRT), SVM, GAM                                                                                                                                 | Yes                   | No |
| Tong et al. [61]          | Southeast region of the United States | Bidirectional LSTM Recurrent Neural Network (RNN)                                                                                                                                                                        | Yes                   | No |
| van Donkelaar et al. [62] | North America                         | GWR                                                                                                                                                                                                                      | Yes                   | No |
| Wang et al. [63]          | Wuhan Urban Agglomeration             | Geo-intelligent LSTM (Geoi-LSTM)                                                                                                                                                                                         | No, using TOA instead | No |
| Wang et al. [64]          | BTH                                   | LME                                                                                                                                                                                                                      | Yes                   | No |
| Wang et al. [65]          | BTH                                   | LME                                                                                                                                                                                                                      | Yes                   | No |
| Wang and Sun [66]         | BTH                                   | DNN                                                                                                                                                                                                                      | Yes                   | No |
| Wei et al. [67]           | China                                 | Space-time extratrees (STET)                                                                                                                                                                                             | Yes                   | No |
| Wei et al. [68]           | China                                 | STET                                                                                                                                                                                                                     | Yes                   | No |
| Wei et al. [69]           | China                                 | STRF                                                                                                                                                                                                                     | Yes                   | No |
| Wu et al. [70]            | BTH                                   | Time fixed effects regression model                                                                                                                                                                                      | Yes                   | No |
| Xiao et al. [71]          | BTH                                   | Weighted long short-term memory neural network extended model (WLSTME)                                                                                                                                                   | Yes                   | No |
| Xiao et al. [72]          | Mainland China                        | Bayesian Maximum Entropy (BME)-GWR                                                                                                                                                                                       | Yes                   | No |
| Xie et al. [73]           | Beijing                               | ME model                                                                                                                                                                                                                 | Yes                   | No |
| Xing et al. [74]          | Beijing                               | Temperature-based deep belief network (TDBN)                                                                                                                                                                             | Yes                   | No |

|                   |                                                             |                                                                                                                                           |     |    |
|-------------------|-------------------------------------------------------------|-------------------------------------------------------------------------------------------------------------------------------------------|-----|----|
| Xu et al. [75]    | BTH                                                         | The site prediction model (TSRT)                                                                                                          | Yes | No |
| Xu and Zhang [76] | Beijing                                                     | Corrected regression                                                                                                                      | Yes | No |
| Xu et al. [77]    | British Columbia                                            | Cubist, RF, XGBoost                                                                                                                       | Yes | No |
| Xue et al. [78]   | China                                                       | Spatiotemporally Weighted RF (SWRF) model                                                                                                 | Yes | No |
| Xue et al. [79]   | BTH                                                         | LME model                                                                                                                                 | Yes | No |
| Xue et al. [80]   | Central and eastern China                                   | Geographically and temporally weighted regression (IGTWR)                                                                                 | Yes | No |
| Yan et al. [81]   | China                                                       | Spatial-Temporal Interpretable Deep Learning Model (SIDLM)                                                                                | Yes | No |
| Yang et al. [82]  | Beijing, Harbin, Xi'an, Wuhan, Chengdu, Hangzhou, Guangzhou | Cascade RF                                                                                                                                | Yes | No |
| Yang et al. [83]  | Coastal region of China                                     | A two-stage statistical model combining LME and SVR                                                                                       | Yes | No |
| Yang et al. [84]  | Fuzhou                                                      | ME model                                                                                                                                  | Yes | No |
| Yang et al. [85]  | Zhejiang                                                    | LUR                                                                                                                                       | Yes | No |
| You et al. [86]   | China                                                       | GWR                                                                                                                                       | Yes | No |
| You et al. [87]   | China                                                       | GWR                                                                                                                                       | Yes | No |
| Zhai et al. [88]  | BTH                                                         | Best subsets regression (BSR) enhanced principal component analysis-GWR (PCA-GWR)                                                         | Yes | No |
| Zhan et al. [89]  | China                                                       | Geographically-Weighted Gradient Boosting Machine (GW-GBM)                                                                                | Yes | No |
| Zhang et al. [90] | Three districts in Lanzhou                                  | A hybrid model (MTD-CNN-GRU)                                                                                                              | Yes | No |
| Zhang et al. [91] | YRD                                                         | Two RF submodels                                                                                                                          | Yes | No |
| Zhang et al. [92] | Wuhan, Beijing, Shanghai                                    | LME                                                                                                                                       | Yes | No |
| Zhang et al. [93] | China                                                       | Semi-physical GWR                                                                                                                         | Yes | No |
| Zhang et al. [94] | China                                                       | GBDT                                                                                                                                      | Yes | No |
| Zhang and Hu [95] | BTH                                                         | ME model                                                                                                                                  | Yes | No |
| Zhang et al. [96] | BTH                                                         | MLR, GWR, LME                                                                                                                             | Yes | No |
| Zhao et al. [97]  | BTH                                                         | RF                                                                                                                                        | Yes | No |
| Zheng et al. [98] | Beijing                                                     | CNN-RF                                                                                                                                    | Yes | No |
| Zhou et al. [99]  | YRD                                                         | dynamic directed spatio-temporal graph convolution networks (DD-STGCN), LSTM, GC-LSTM, spatio-temporal graph convolution networks (STGCN) | Yes | No |
| Zou et al. [100]  | BTH                                                         | GAM                                                                                                                                       | Yes | No |
| Zou et al. [101]  | BTH                                                         | GWR                                                                                                                                       | Yes | No |

Table S2. AERONET stations and their data level used in this study.

| AEROENT station | Longitude | Latitude | Levels |
|-----------------|-----------|----------|--------|
| Adelaide_Site_7 | 138.66    | -34.73   | 1.5    |



|                     |         |        |     |
|---------------------|---------|--------|-----|
| American_Samoa      | -170.56 | -14.25 | 1.5 |
| Anmyon              | 126.33  | 36.54  | 1.5 |
| AOE_Baotou          | 109.63  | 40.85  | 1.5 |
| ARIAKE_TOWER        | 130.27  | 33.10  | 1.5 |
| Bandung             | 107.61  | -6.89  | 1.5 |
| Bangkok             | 100.52  | 13.75  | 2.0 |
| Beijing             | 116.38  | 39.98  | 1.5 |
| Beijing_RADI        | 116.38  | 40.00  | 1.5 |
| Beijing-CAMS        | 116.32  | 39.93  | 1.5 |
| Bhola               | 90.76   | 22.23  | 1.5 |
| Bidur               | 85.14   | 27.90  | 1.5 |
| Birdsville          | 139.35  | -25.90 | 1.5 |
| BMKG_GAW_PALU       | 120.18  | -1.65  | 2.0 |
| BMKG_Jakarta        | 106.84  | -6.16  | 1.5 |
| Bukit_Kototabang    | 100.32  | -0.20  | 1.5 |
| Cape_Fuguei_Station | 121.54  | 25.30  | 2.0 |
| Chen-Kung_Univ      | 120.20  | 22.99  | 1.5 |
| Chiang_Dao          | 98.96   | 19.45  | 1.5 |
| Chiang_Mai_Met_Sta  | 98.97   | 18.77  | 2.0 |
| Chiba_University    | 140.10  | 35.62  | 1.5 |
| Dalanzadgad         | 104.42  | 43.58  | 1.5 |
| Dhaka_University    | 90.40   | 23.73  | 1.5 |
| Dibrugarh_Univ      | 94.90   | 27.45  | 1.5 |
| Doi_Ang_Khang       | 99.05   | 19.93  | 1.5 |
| Dongsha_Island      | 116.73  | 20.70  | 1.5 |
| Douliu              | 120.54  | 23.71  | 1.5 |
| EPA-NCU             | 121.19  | 24.97  | 2.0 |
| Erlin               | 120.41  | 23.93  | 1.5 |
| Fowlers_Gap         | 141.70  | -31.09 | 1.5 |
| Fukue               | 128.68  | 32.75  | 1.5 |
| Fukuoka             | 130.48  | 33.52  | 1.5 |
| Gandhi_College      | 84.13   | 25.87  | 1.5 |
| Gangneung_WNU       | 128.87  | 37.77  | 2.0 |
| Gwangju_GIST        | 126.84  | 35.23  | 1.5 |
| Hankuk_UFS          | 127.27  | 37.34  | 1.5 |
| Hokkaido_University | 141.34  | 43.08  | 1.5 |
| Hong_Kong_PolyU     | 114.18  | 22.30  | 1.5 |
| Hong_Kong_Sheung    | 114.12  | 22.48  | 1.5 |
| Irkutsk             | 103.09  | 51.80  | 1.5 |
| Jabiru              | 132.89  | -12.66 | 1.5 |
| Jambi               | 103.64  | -1.63  | 1.5 |
| Kanpur              | 80.23   | 26.51  | 1.5 |
| Kaohsiung           | 120.29  | 22.68  | 1.5 |
| Kemigawa_Offshore   | 140.02  | 35.61  | 1.5 |
| KORUS_UNIST_Ulsan   | 129.19  | 35.58  | 1.5 |
| Kuching             | 110.35  | 1.49   | 1.5 |
| Kupang              | 123.67  | -10.14 | 1.5 |
| Kwajalein_Atoll     | 167.74  | 8.85   | 1.5 |
| Kyanjin_Gompa       | 85.57   | 28.21  | 1.5 |
| Lake_Argyle         | 128.75  | -16.11 | 1.5 |
| Lake_Lefroy         | 121.71  | -31.26 | 1.5 |
| Langtang_BC         | 85.61   | 28.21  | 1.5 |
| Learmonth           | 114.10  | -22.24 | 1.5 |

|                    |        |        |     |
|--------------------|--------|--------|-----|
| Luang_Namtha       | 101.42 | 20.93  | 1.5 |
| Lucinda            | 146.39 | -18.52 | 2.0 |
| Lulin              | 120.87 | 23.47  | 2.0 |
| Lumbini_North      | 83.28  | 27.50  | 1.5 |
| Makassar           | 119.57 | -5.00  | 1.5 |
| Mandalay_MTU       | 96.19  | 21.97  | 1.5 |
| Manila_Observatory | 121.08 | 14.64  | 1.5 |
| ND_Marbel_Univ     | 124.84 | 6.50   | 1.5 |
| Niigata            | 138.94 | 37.85  | 1.5 |
| Nong_Khai          | 102.72 | 17.88  | 1.5 |
| Noto               | 137.14 | 37.33  | 1.5 |
| NSPO_Taiwan        | 121.00 | 24.78  | 1.5 |
| Okinawa_Hedo       | 128.25 | 26.87  | 1.5 |
| Osaka              | 135.59 | 34.65  | 1.5 |
| Palangkaraya       | 113.95 | -2.23  | 1.5 |
| Pokhara            | 83.98  | 28.19  | 1.5 |
| Pontianak          | 109.19 | 0.08   | 1.5 |
| QOMS_CAS           | 86.95  | 28.37  | 1.5 |
| Seoul_SNU          | 126.95 | 37.46  | 1.5 |
| Shirahama          | 135.36 | 33.69  | 1.5 |
| Silpakorn_Univ     | 100.04 | 13.82  | 2.0 |
| Singapore          | 103.78 | 1.30   | 1.5 |
| Socheongcho        | 124.74 | 37.42  | 2.0 |
| Songkhla_Met_Sta   | 100.60 | 7.18   | 2.0 |
| Sorong             | 131.27 | -0.87  | 1.5 |
| Sra_Kaeo           | 102.50 | 13.69  | 2.0 |
| Tai_Ping           | 114.36 | 10.38  | 1.5 |
| Taipei_CWB         | 121.54 | 25.01  | 1.5 |
| TGF_Tsukuba        | 140.10 | 36.11  | 1.5 |
| Tomsk              | 85.05  | 56.48  | 1.5 |
| Tumbarumba         | 147.95 | -35.71 | 1.5 |
| Ubon_Ratchathani   | 104.87 | 15.25  | 2.0 |
| Univ_of_Auckland   | 174.77 | -36.85 | 1.5 |
| USM_Penang         | 100.30 | 5.36   | 1.5 |
| Ussuriysk          | 132.16 | 43.70  | 1.5 |
| XiangHe            | 116.96 | 39.75  | 1.5 |
| Xitun              | 120.62 | 24.16  | 2.0 |
| Yonsei_University  | 126.93 | 37.56  | 2.0 |

**Table S3.** The parameters for the four machine learning models used in this study.

| Models        | Max_depth | N_estimators | N_jobs | Learning rate |
|---------------|-----------|--------------|--------|---------------|
| Extratrees    | 7         | 200          | 4      | 0.1           |
| Random Forest | 6         | 200          | 4      | 0.1           |
| XGBoost       | 5         | 160          | 4      | 0.1           |
| LightGBM      | 5         | 300          | 4      | 0.1           |

**Table S4.** The class types and their abbreviations of global climate zone.

| Value | Abbreviation | Class type           |
|-------|--------------|----------------------|
| 1     | Af           | Tropical, rainforest |
| 2     | Am           | Tropical, monsoon    |
| 3     | Aw           | Tropical, savannah   |
| 4     | BWk          | Arid, desert, cold   |

|    |     |                                       |
|----|-----|---------------------------------------|
| 5  | BSh | Arid, steppe, hot                     |
| 6  | BSk | Arid, steppe, cold                    |
| 7  | Cwa | Temperate, dry winter, hot summer     |
| 8  | Cwb | Temperate, dry winter, warm summer    |
| 9  | Cwc | Temperate, dry winter, cold summer    |
| 10 | Cfa | Temperate, no dry season, hot summer  |
| 11 | Cfb | Temperate, no dry season, warm summer |
| 12 | Cfc | Temperate, no dry season, cold summer |
| 13 | Dsb | Cold, dry summer, warm summer         |
| 14 | Dsc | Cold, dry summer, cold summer         |
| 15 | Dwa | Cold, dry winter, hot summer          |
| 16 | Dwb | Cold, dry winter, warm summer         |
| 17 | Dwc | Cold, dry winter, cold summer         |
| 18 | Dfa | Cold, no dry season, hot summer       |
| 19 | Dfb | Cold, no dry season, warm summer      |
| 20 | Dfc | Cold, no dry season, cold summer      |
| 21 | ET  | Polar, tundra                         |
| 22 | EF  | Polar, frost                          |

**Table S5.** The evaluation of MODIS, VIIRS and Himawari-8 V2.1 and V3.0 FMF against the AERO-NET stations mainland China.

| Products        | RMSE | R    | N    |
|-----------------|------|------|------|
| MODIS           | 0.53 | 0.30 | 272  |
| VIIRS           | 0.55 | 0.31 | 430  |
| Himawari-8 V2.1 | 0.37 | 0.21 | 8959 |
| Himawari-8 V3.0 | 0.21 | 0.54 | 7378 |

## Reference

- Chen, B., Lin, Y., Deng, J., Li, Z., Dong, L., Huang, Y., & Wang, K. (2021a). Spatiotemporal dynamics and exposure analysis of daily PM<sub>2.5</sub> using a remote sensing-based machine learning model and multi-time meteorological parameters. *Atmospheric Pollution Research*, 12, 23-31
- Chen, B., You, S., Ye, Y., Fu, Y., Ye, Z., Deng, J., Wang, K., & Hong, Y. (2021b). An interpretable self-adaptive deep neural network for estimating daily spatially-continuous PM<sub>2.5</sub> concentrations across China. *The Science of the total environment*, 768, 144724-144724
- Chen, J., Yin, J., Zang, L., Zhang, T., & Zhao, M. (2019a). Stacking machine learning model for estimating hourly PM<sub>2.5</sub> in China based on Himawari 8 aerosol optical depth data. *Science of the Total Environment*, 697
- Chen, Q.-X., Huang, C.-L., Yuan, Y., Mao, Q.-J., & Tan, H.-P. (2019b). Assessment of aerosol types on improving the estimation of surface PM<sub>2.5</sub> concentrations by using ground-based aerosol optical depth dataset. *Atmospheric Pollution Research*, 10, 1843-1851
- Chen, W., Ran, H., Cao, X., Wang, J., Teng, D., Chen, J., & Zheng, X. (2020a). Estimating PM<sub>2.5</sub> with high-resolution 1-km AOD data and an improved machine learning model over Shenzhen, China. *Science of the Total Environment*, 746
- Chen, Z.-Y., Jin, J.-Q., Zhang, R., Zhang, T.-H., Chen, J.-J., Yang, J., Ou, C.-Q., & Guo, Y. (2020b). Comparison of Different Missing-Imputation Methods for MAIAC (Multiangle Implementation of Atmospheric Correction) AOD in Estimating Daily PM<sub>2.5</sub> Levels. *Remote Sensing*, 12
- Chu, H.-J., & Bilal, M. (2019). PM<sub>2.5</sub> mapping using integrated geographically temporally weighted regression (GTWR) and random sample consensus (RANSAC) models. *Environmental Science and Pollution Research*, 26, 1902-1910
- Di, Q., Amini, H., Shi, L., Kloog, I., Silvern, R., Kelly, J., Sabath, M.B., Choirat, C., Koutrakis, P., Lyapustin, A., Wang, Y., Mickley, L.J., & Schwartz, J. (2019). An ensemble-based model of PM<sub>2.5</sub> concentration across the contiguous United States with high spatiotemporal resolution. *Environment International*, 130
- Dong, L., Li, S., Yang, J., Shi, W., & Zhang, L. (2020). Investigating the performance of satellite-based models in estimating the surface PM<sub>2.5</sub> over China. *Chemosphere*, 256
- Fan, Z., Zhan, Q., Yang, C., Liu, H., & Bilal, M. (2020). Estimating PM<sub>2.5</sub> Concentrations Using Spatially Local Xgboost Based on Full-Covered SARA AOD at the Urban Scale. *Remote Sensing*, 12
- Fang, X., Zou, B., Liu, X., Sternberg, T., & Zhai, L. (2016). Satellite-based ground PM<sub>2.5</sub> estimation using timely structure adaptive modeling. *Remote Sensing of Environment*, 186, 152-163

12. Feng, L., Li, Y., Wang, Y., & Du, Q. (2020). Estimating hourly and continuous ground-level PM<sub>2.5</sub> concentrations using an ensemble learning algorithm: The ST-stacking model. *Atmospheric Environment*, 223
13. Fu, D., Xia, X., Duan, M., Zhang, X., Li, X., Wang, J., & Liu, J. (2018). Mapping nighttime PM<sub>2.5</sub> from VIIRS DNB using a linear mixed-effect model. *Atmospheric Environment*, 178, 214-222
14. Guo, B., Zhang, D., Pei, L., Su, Y., Wang, X., Bian, Y., Zhang, D., Yao, W., Zhou, Z., & Guo, L. (2021). Estimating PM<sub>2.5</sub> concentrations via random forest method using satellite, auxiliary, and ground-level station dataset at multiple temporal scales across China in 2017. *The Science of the total environment*, 778, 146288-146288
15. Han, W., & Tong, L. (2019). Satellite-Based Estimation of Daily Ground-Level PM<sub>2.5</sub> Concentrations over Urban Agglomeration of Chengdu Plain. *Atmosphere*, 10
16. Han, W., Tong, L., Chen, Y., Li, R., Yan, B., & Liu, X. (2018). Estimation of High-Resolution Daily Ground-Level PM<sub>2.5</sub> Concentration in Beijing 2013-2017 Using 1 km MAIAC AOT Data. *Applied Sciences-Basel*, 8
17. He, J., & Christakos, G. (2018). Space-time PM<sub>2.5</sub> mapping in the severe haze region of Jing-Jin-Ji (China) using a synthetic approach. *Environmental Pollution*, 240, 319-329
18. Hu, H., Hu, Z., Zhong, K., Xu, J., Zhang, F., Zhao, Y., & Wu, P. (2019). Satellite-based high-resolution mapping of ground-level PM<sub>2.5</sub> concentrations over East China using a spatiotemporal regression kriging model. *Science of the Total Environment*, 672, 479-490
19. Huang, Y., Ji, Y., Zhu, Z., Zhang, T., Gong, W., Xia, X., Sun, H., Zhong, X., Zhou, X., & Chen, D. (2020). Satellite-based spatio-temporal trends of ambient PM<sub>2.5</sub> concentrations and influential factors in Hubei, Central China. *Atmospheric Research*, 241
20. Hung, W.-T., Lu, C.-H., Alessandrini, S., Kumar, R., & Lin, C.-A. (2020). Estimation of PM<sub>2.5</sub> Concentrations in New York State: Understanding the Influence of Vertical Mixing on Surface PM<sub>2.5</sub> Using Machine Learning. *Atmosphere*, 11
21. Imani, M. (2021). Particulate matter (PM<sub>2.5</sub> and PM<sub>10</sub>) generation map using MODIS Level-1 satellite images and deep neural network. *Journal of environmental management*, 281, 111888-111888
22. Jiang, T., Chen, B., Nie, Z., Ren, Z., Xu, B., & Tang, S. (2021). Estimation of hourly full-coverage PM<sub>2.5</sub> concentrations at 1-km resolution in China using a two-stage random forest model. *Atmospheric Research*, 248
23. Jung, C.-R., Hwang, B.-F., & Chen, W.-T. (2018). Incorporating long-term satellite-based aerosol optical depth, localized land use data, and meteorological variables to estimate ground-level PM<sub>2.5</sub> concentrations in Taiwan from 2005 to 2015. *Environmental Pollution*, 237, 1000-1010
24. Kianian, B., Liu, Y., & Chang, H.H. (2021). Imputing Satellite-Derived Aerosol Optical Depth Using a Multi-Resolution Spatial Model and Random Forest for PM<sub>2.5</sub> Prediction. *Remote Sensing*, 13
25. Kim, S.-M., Yoon, J., Moon, K.-J., Kim, D.-R., Koo, J.-H., Choi, M., Kim, K.N., & Lee, Y.G. (2018). Empirical Estimation and Diurnal Patterns of Surface PM<sub>2.5</sub> Concentration in Seoul Using GOCI AOD. *Korean Journal of Remote Sensing*, 34, 451-463
26. Knibbs, L.D., van Donkelaar, A., Martin, R.V., Bechle, M.J., Brauer, M., Cohen, D.D., Cowie, C.T., Dirgawati, M., Guo, Y., Brauer, M., Cohen, D.D., Cowie, C.T., Dirgawati, M., Guo, Y., Hanigan, I.C., Johnston, F.H., Marks, G.B., Marshall, J.D., Pereira, G., Jalaludin, B., Heyworth, J.S., Morgan, G.G., & Barnett, A.G. (2018). Satellite-Based Land-Use Regression for Continental-Scale Long-Term Ambient PM<sub>2.5</sub> Exposure Assessment in Australia. *Environmental Science & Technology*, 52, 12445-12455
27. Kow, P.-Y., Wang, Y.-S., Zhou, Y., Kao, I.F., Issermann, M., Chang, L.-C., & Chang, F.-J. (2020). Seamless integration of convolutional and back-propagation neural networks for regional multi-step-ahead PM<sub>2.5</sub> forecasting. *Journal of Cleaner Production*, 261
28. Lee, H.J., Chatfield, R.B., & Strawa, A.W. (2016). Enhancing the Applicability of Satellite Remote Sensing for PM<sub>2.5</sub> Estimation Using MODIS Deep Blue AOD and Land Use Regression in California, United States. *Environmental Science & Technology*, 50, 6546-6555
29. Li, H., Yang, Y., Wang, H., Li, B., Wang, P., Li, J., & Liao, H. (2021a). Constructing a spatiotemporally coherent long-term PM<sub>2.5</sub> concentration dataset over China during 1980-2019 using a machine learning approach. *Science of the Total Environment*, 765
30. Li, J., Garshick, E., Hart, J.E., Li, L., Shi, L., Al-Hemoud, A., Huang, S., & Koutrakis, P. (2021b). Estimation of ambient PM<sub>2.5</sub> in Iraq and Kuwait from 2001 to 2018 using machine learning and remote sensing. *Environment International*, 151, 106445-106445
31. Li, L. (2020). A Robust Deep Learning Approach for Spatiotemporal Estimation of Satellite AOD and PM<sub>2.5</sub>. *Remote Sensing*, 12
32. Li, L., Girguis, M., Lurmann, F., Pavlovic, N., McClure, C., Franklin, M., Wu, J., Oman, L.D., Breton, C., Gilliland, F., & Habre, R. (2020a). Ensemble-based deep learning for estimating PM<sub>2.5</sub> over California with multisource big data including wildfire smoke. *Environment International*, 145
33. Li, L., Zhang, J., Meng, X., Fang, Y., Ge, Y., Wang, J., Wang, C., Wu, J., & Kan, H. (2018). Estimation of PM<sub>2.5</sub> concentrations at a high spatiotemporal resolution using constrained mixed-effect bagging models with MAIAC aerosol optical depth. *Remote Sensing of Environment*, 217, 573-586
34. Li, S., Zou, B., Fang, X., & Lin, Y. (2020b). Time series modeling of PM<sub>2.5</sub> concentrations with residual variance constraint in eastern mainland China during 2013-2017. *Science of the Total Environment*, 710
35. Li, T., Shen, H., Yuan, Q., & Zhang, L. (2020c). Geographically and temporally weighted neural networks for satellite-based mapping of ground-level PM<sub>2.5</sub>. *Isprs Journal of Photogrammetry and Remote Sensing*, 167, 178-188
36. Li, T., Shen, H., Yuan, Q., Zhang, X., & Zhang, L. (2017). Estimating Ground-Level PM<sub>2.5</sub> by Fusing Satellite and Station Observations: A Geo-Intelligent Deep Learning Approach. *Geophysical Research Letters*, 44, 11985-11993

37. Li, X., & Zhang, X. (2019). Predicting ground-level PM<sub>2.5</sub> concentrations in the Beijing-Tianjin-Hebei region: A hybrid remote sensing and machine learning approach. *Environmental Pollution*, 249, 735-749
38. Li, Z., Yim, S.H.-L., & Ho, K.-F. (2020d). High temporal resolution prediction of street-level PM<sub>2.5</sub> and NO<sub>x</sub> concentrations using machine learning approach. *Journal of Cleaner Production*, 268
39. Liang, F., Xiao, Q., Huang, K., Yang, X., Liu, F., Li, J., Lu, X., Liu, Y., & Gu, D. (2020). The 17-y spatiotemporal trend of PM<sub>2.5</sub> and its mortality burden in China. *Proceedings of the National Academy of Sciences of the United States of America*, 117, 25601-25608
40. Liu, J., Weng, F., & Li, Z. (2019). Satellite-based PM<sub>2.5</sub> estimation directly from reflectance at the top of the atmosphere using a machine learning algorithm. *Atmospheric Environment*, 208, 113-122
41. Lu, J., Zhang, Y., Chen, M., Wang, L., Zhao, S., Pu, X., & Chen, X. (2021). Estimation of monthly 1 km resolution PM<sub>2.5</sub> concentrations using a random forest model over "2+26" cities, China. *Urban Climate*, 35
42. Luo, Y., Teng, M., Yang, K., Zhu, Y., Zhou, X., Zhang, M., & Shi, Y. (2019). Research on PM<sub>2.5</sub> estimation and prediction method and changing characteristics analysis under long temporal and large spatial scale - A case study in China typical regions. *Science of the Total Environment*, 696
43. Lv, B., Hu, Y., Chang, H.H., Russell, A.G., Cai, J., Xu, B., & Bai, Y. (2017). Daily estimation of ground-level PM<sub>2.5</sub> concentrations at 4 km resolution over Beijing-Tianjin-Hebei by fusing MODIS AOD and ground observations. *Science of the Total Environment*, 580, 235-244
44. Lyu, B., Hu, Y., Zhang, W., Du, Y., Luo, B., Sun, X., Sun, Z., Deng, Z., Wang, X., Liu, J., Wang, X., & Russell, A.G. (2019). Fusion Method Combining Ground-Level Observations with Chemical Transport Model Predictions Using an Ensemble Deep Learning Framework: Application in China to Estimate Spatiotemporally-Resolved PM<sub>2.5</sub> Exposure Fields in 2014-2017. *Environmental Science & Technology*, 53, 7306-7315
45. Ma, J., Cheng, J.C.P., Lin, C., Tan, Y., & Zhang, J. (2019). Improving air quality prediction accuracy at larger temporal resolutions using deep learning and transfer learning techniques. *Atmospheric Environment*, 214
46. Ma, Z., Liu, Y., Zhao, Q., Liu, M., Zhou, Y., & Bi, J. (2016). Satellite-derived high resolution PM<sub>2.5</sub> concentrations in Yangtze River Delta Region of China using improved linear mixed effects model. *Atmospheric Environment*, 133, 156-164
47. Nabavi, S.O., Haimberger, L., & Abbasi, E. (2019). Assessing PM<sub>2.5</sub> concentrations in Tehran, Iran, from space using MAIAC, deep blue, and dark target AOD and machine learning algorithms. *Atmospheric Pollution Research*, 10, 889-903
48. Nguyen, T.T.N., Bui, H.Q., Pham, H.V., Luu, H.V., Man, C.D., Pham, H.N., Le, H.T., & Nguyen, T.T. (2015). Particulate matter concentration mapping from MODIS satellite data: a Vietnamese case study. *Environmental Research Letters*, 10
49. Ni, X., Cao, C., Zhou, Y., Cui, X., & Singh, R.P. (2018). Spatio-Temporal Pattern Estimation of PM<sub>2.5</sub> in Beijing-Tianjin-Hebei Region Based on MODIS AOD and Meteorological Data Using the Back Propagation Neural Network. *Atmosphere*, 9
50. Park, S., Lee, J., Im, J., Song, C.-K., Choi, M., Kim, J., Lee, S., Park, R., Kim, S.-M., Yoon, J., Lee, D.-W., & Quackenbush, L.J. (2020a). Estimation of spatially continuous daytime particulate matter concentrations under all sky conditions through the synergistic use of satellite-based AOD and numerical models. *Science of the Total Environment*, 713
51. Park, S., Shin, M., Im, J., Song, C.-K., Choi, M., Kim, J., Lee, S., Park, R., Kim, J., Lee, D.-W., & Kim, S.-K. (2019). Estimation of ground-level particulate matter concentrations through the synergistic use of satellite observations and process-based models over South Korea. *Atmospheric Chemistry and Physics*, 19, 1097-1113
52. Park, Y., Kwon, B., Heo, J., Hu, X., Liu, Y., & Moon, T. (2020b). Estimating PM<sub>2.5</sub> concentration of the conterminous United States via interpretable convolutional neural networks. *Environmental Pollution*, 256
53. Pu, Q., & Yoo, E.-H. (2021). Ground PM<sub>2.5</sub> prediction using imputed MAIAC AOD with uncertainty quantification. *Environmental pollution (Barking, Essex : 1987)*, 274, 116574-116574
54. Ren, X., Mi, Z., & Georgopoulos, P.G. (2020). Comparison of Machine Learning and Land Use Regression for fine scale spatio-temporal estimation of ambient air pollution: Modeling ozone concentrations across the contiguous United States. *Environment International*, 142
55. Schneider, R., Vicedo-Cabrera, A.M., Sera, F., Masselot, P., Stafoggia, M., de Hoogh, K., Kloog, I., Reis, S., Vieno, M., & Gasparini, A. (2020). A Satellite-Based Spatio-Temporal Machine Learning Model to Reconstruct Daily PM<sub>2.5</sub> Concentrations across Great Britain. *Remote Sensing*, 12
56. Song, W., Jia, H., Huang, J., & Zhang, Y. (2014). A satellite-based geographically weighted regression model for regional PM<sub>2.5</sub> estimation over the Pearl River Delta region in China. *Remote Sensing of Environment*, 154, 1-7
57. Stafoggia, M., Bellander, T., Bucci, S., Davoli, M., de Hoogh, K., de'Donato, F., Gariazzo, C., Lyapustin, A., Michelozzi, P., Renzi, M., Scortichini, M., Shtein, A., Viegi, G., Kloog, I., & Schwartz, J. (2019). Estimation of daily PM<sub>10</sub> and PM<sub>2.5</sub> concentrations in Italy, 2013-2015, using a spatiotemporal land-use random-forest model. *Environment International*, 124, 170-179
58. Sun, Y., Zeng, Q., Geng, B., Lin, X., Sude, B., & Chen, L. (2019). Deep Learning Architecture for Estimating Hourly Ground-Level PM<sub>2.5</sub> Using Satellite Remote Sensing. *Ieee Geoscience and Remote Sensing Letters*, 16, 1343-1347
59. Tang, D., Liu, D., Tang, Y., Seyler, B.C., Deng, X., & Zhan, Y. (2019). Comparison of GOCI and Himawari-8 aerosol optical depth for deriving full-coverage hourly PM<sub>2.5</sub> across the Yangtze River Delta. *Atmospheric Environment*, 217
60. Tian, H., Zhao, Y., Luo, M., He, Q., Han, Y., & Zeng, Z. (2021). Estimating PM<sub>2.5</sub> from multisource data: A comparison of different machine learning models in the Pearl River Delta of China. *Urban Climate*, 35
61. Tong, W., Li, L., Zhou, X., Hamilton, A., & Zhang, K. (2019). Deep learning PM<sub>2.5</sub> concentrations with bidirectional LSTM RNN. *Air Quality Atmosphere and Health*, 12, 411-423

62. van Donkelaar, A., Martin, R.V., Spurr, R.J.D., & Burnett, R.T. (2015). High-Resolution Satellite-Derived PM<sub>2.5</sub> from Optimal Estimation and Geographically Weighted Regression over North America. *Environmental Science & Technology*, 49, 10482-10491
63. Wang, B., Yuan, Q., Yang, Q., Zhu, L., Li, T., & Zhang, L. (2021). Estimate hourly PM<sub>2.5</sub> concentrations from Himawari-8 TOA reflectance directly using geo-intelligent long short-term memory network. *Environmental pollution (Barking, Essex : 1987)*, 271, 116327-116327
64. Wang, Q., Zeng, Q., Tao, J., Sun, L., Zhang, L., Gu, T., Wang, Z., & Chen, L. (2019). Estimating PM<sub>2.5</sub> Concentrations Based on MODIS AOD and NAQPMS Data over Beijing-Tianjin-Hebei. *Sensors*, 19
65. Wang, W., Mao, F., Du, L., Pan, Z., Gong, W., & Fang, S. (2017). Deriving Hourly PM<sub>2.5</sub> Concentrations from Himawari-8 AODs over Beijing-Tianjin-Hebei in China. *Remote Sensing*, 9
66. Wang, X., & Sun, W. (2019). Meteorological parameters and gaseous pollutant concentrations as predictors of daily continuous PM<sub>2.5</sub> concentrations using deep neural network in Beijing-Tianjin-Hebei, China. *Atmospheric Environment*, 211, 128-137
67. Wei, J., Huang, W., Li, Z., Xue, W., Peng, Y., Sun, L., & Cribb, M. (2019). Estimating 1-km-resolution PM<sub>2.5</sub> concentrations across China using the space-time random forest approach. *Remote Sensing of Environment*, 231
68. Wei, J., Li, Z., Cribb, M., Huang, W., Xue, W., Sun, L., Guo, J., Peng, Y., Li, J., Lyapustin, A., Liu, L., Wu, H., & Song, Y. (2020). Improved 1 km resolution PM<sub>2.5</sub> estimates across China using enhanced space-time extremely randomized trees. *Atmospheric Chemistry and Physics*, 20, 3273-3289
69. Wei, J., Li, Z., Lyapustin, A., Sun, L., Peng, Y., Xue, W., Su, T., & Cribb, M. (2021). Reconstructing 1-km-resolution high-quality PM<sub>2.5</sub> data records from 2000 to 2018 in China: spatiotemporal variations and policy implications. *Remote Sensing of Environment*, 252
70. Wu, J., Yao, F., Li, W., & Si, M. (2016). VIIRS-based remote sensing estimation of ground-level PM<sub>2.5</sub> concentrations in Beijing-Tianjin-Hebei: A spatiotemporal statistical model. *Remote Sensing of Environment*, 184, 316-328
71. Xiao, F., Yang, M., Fan, H., Fan, G., & Al-qaness, M.A.A. (2020). An improved deep learning model for predicting daily PM<sub>2.5</sub> concentration. *Scientific Reports*, 10
72. Xiao, L., Lang, Y., & Christakos, G. (2018). High-resolution spatiotemporal mapping of PM<sub>2.5</sub> concentrations at Mainland China using a combined BME-GWR technique. *Atmospheric Environment*, 173, 295-305
73. Xie, Y., Wang, Y., Zhang, K., Dong, W., Lv, B., & Bai, Y. (2015). Daily Estimation of Ground-Level PM<sub>2.5</sub> Concentrations over Beijing Using 3 km Resolution MODIS AOD. *Environmental Science & Technology*, 49, 12280-12288
74. Xing, H., Wang, G., Liu, C., & Suo, M. (2021). PM<sub>2.5</sub> concentration modeling and prediction by using temperature-based deep belief network. *Neural Networks*, 133, 157-165
75. Xu, X., Tong, T., Zhang, W., & Meng, L. (2020). Fine-grained prediction of PM<sub>2.5</sub> concentration based on multisource data and deep learning. *Atmospheric Pollution Research*, 11, 1728-1737
76. Xu, X., & Zhang, C. (2020). Estimation of ground-level PM(2.5) concentration using MODIS AOD and corrected regression model over Beijing, China. *Plos One*, 15
77. Xu, Y., Ho, H.C., Wong, M.S., Deng, C., Shi, Y., Chan, T.-C., & Knudby, A. (2018). Evaluation of machine learning techniques with multiple remote sensing datasets in estimating monthly concentrations of ground-level PM<sub>2.5</sub>. *Environmental Pollution*, 242, 1417-1426
78. Xue, W., Wei, J., Zhang, J., Sun, L., Che, Y., Yuan, M., & Hu, X. (2021a). Inferring Near-Surface PM<sub>2.5</sub> Concentrations from the VIIRS Deep Blue Aerosol Product in China: A Spatiotemporally Weighted Random Forest Model. *Remote Sensing*, 13
79. Xue, W., Zhang, J., Zhong, C., Li, X., & Wei, J. (2021b). Spatiotemporal PM<sub>2.5</sub> variations and its response to the industrial structure from 2000 to 2018 in the Beijing-Tianjin-Hebei region. *Journal of Cleaner Production*, 279
80. Xue, Y., Li, Y., Guang, J., Tugui, A., She, L., Qin, K., Fan, C., Che, Y., Xie, Y., Wen, Y., & Wang, Z. (2020). Hourly PM<sub>2.5</sub> Estimation over Central and Eastern China Based on Himawari-8 Data. *Remote Sensing*, 12
81. Yan, X., Zang, Z., Jiang, Y., Shi, W., Guo, Y., Li, D., Zhao, C., & Husi, L. (2021). A Spatial-Temporal Interpretable Deep Learning Model for improving interpretability and predictive accuracy of satellite-based PM<sub>2.5</sub>. *Environmental pollution (Barking, Essex : 1987)*, 273, 116459-116459
82. Yang, L., Xu, H., & Jin, Z. (2018a). Estimating spatial variability of ground-level PM<sub>2.5</sub> based on a satellite-derived aerosol optical depth product: Fuzhou, China. *Atmospheric Pollution Research*, 9, 1194-1203
83. Yang, L., Xu, H., & Jin, Z. (2019). Estimating ground-level PM<sub>2.5</sub> over a coastal region of China using satellite AOD and a combined model. *Journal of Cleaner Production*, 227, 472-482
84. Yang, Q., Yuan, Q., Li, T., & Yue, L. (2020). Mapping PM<sub>2.5</sub> concentration at high resolution using a cascade random forest based downscaling model: Evaluation and application. *Journal of Cleaner Production*, 277
85. Yang, S., Wu, H., Chen, J., Lin, X., & Lu, T. (2018b). Optimization of PM<sub>2.5</sub> Estimation Using Landscape Pattern Information and Land Use Regression Model in Zhejiang, China. *Atmosphere*, 9
86. You, W., Zang, Z., Zhang, L., Li, Y., Pan, X., & Wang, W. (2016a). National-Scale Estimates of Ground-Level PM<sub>2.5</sub> Concentration in China Using Geographically Weighted Regression Based on 3 km Resolution MODIS AOD. *Remote Sensing*, 8
87. You, W., Zang, Z., Zhang, L., Li, Y., & Wang, W. (2016b). Estimating national-scale ground-level PM<sub>2.5</sub> concentration in China using geographically weighted regression based on MODIS and MISR AOD. *Environmental Science and Pollution Research*, 23, 8327-8338

88. Zhai, L., Li, S., Zou, B., Sang, H., Fang, X., & Xu, S. (2018). An improved geographically weighted regression model for PM2.5 concentration estimation in large areas. *Atmospheric Environment*, 181, 145-154
89. Zhan, Y., Luo, Y., Deng, X., Chen, H., Grieneisen, M.L., Shen, X., Zhu, L., & Zhang, M. (2017). Spatiotemporal prediction of continuous daily PM2.5 concentrations across China using a spatially explicit machine learning algorithm. *Atmospheric Environment*, 155, 129-139
90. Zhang, Q., Wu, S., Wang, X., Sun, B., & Liu, H. (2020a). A PM2.5 concentration prediction model based on multi-task deep learning for intensive air quality monitoring stations. *Journal of Cleaner Production*, 275
91. Zhang, R., Di, B., Luo, Y., Deng, X., Grieneisen, M.L., Wang, Z., Yao, G., & Zhan, Y. (2018a). A nonparametric approach to filling gaps in satellite-retrieved aerosol optical depth for estimating ambient PM2.5 levels. *Environmental Pollution*, 243, 998-1007
92. Zhang, T., He, W., Zheng, H., Cui, Y., Song, H., & Fu, S. (2021). Satellite-based ground PM2.5 estimation using a gradient boosting decision tree. *Chemosphere*, 268, 128801-128801
93. Zhang, T., Liu, G., Zhu, Z., Gong, W., Ji, Y., & Huang, Y. (2016). Real-Time Estimation of Satellite-Derived PM2.5 Based on a Semi-Physical Geographically Weighted Regression Model. *International Journal of Environmental Research and Public Health*, 13
94. Zhang, T., Zhu, Z., Gong, W., Zhu, Z., Sun, K., Wang, L., Huang, Y., Mao, F., Shen, H., Li, Z., & Xu, K. (2018b). Estimation of ultrahigh resolution PM2.5 concentrations in urban areas using 160 m Gaofen-1 AOD retrievals. *Remote Sensing of Environment*, 216, 91-104
95. Zhang, X., & Hu, H. (2017). Improving Satellite-Driven PM2.5 Models with VIIRS Nighttime Light Data in the Beijing-Tianjin-Hebei Region, China. *Remote Sensing*, 9
96. Zhang, Y., Wang, W., Ma, Y., Wu, L., Xu, W., & Li, J. (2020b). Improvement in hourly PM2.5 estimations for the Beijing-Tianjin-Hebei region by introducing an aerosol modeling product from MASINGAR. *Environmental Pollution*, 264
97. Zhao, C., Wang, Q., Ban, J., Liu, Z., Zhang, Y., Ma, R., Li, S., & Li, T. (2020). Estimating the daily PM2.5 concentration in the Beijing-Tianjin-Hebei region using a random forest model with a 0.01 degrees x 0.01 degrees spatial resolution. *Environment International*, 134
98. Zheng, T., Bergin, M.H., Hu, S., Miller, J., & Carlson, D.E. (2020). Estimating ground-level PM2.5 using micro-satellite images by a convolutional neural network and random forest approach. *Atmospheric Environment*, 230
99. Zhou, W., Wu, X., Ding, S., Ji, X., & Pan, W. (2021). Predictions and mitigation strategies of PM2.5 concentration in the Yangtze River Delta of China based on a novel nonlinear seasonal grey model. *Environmental pollution (Barking, Essex : 1987)*, 276, 116614-116614
100. Zou, B., Chen, J., Zhai, L., Fang, X., & Zheng, Z. (2017). Satellite Based Mapping of Ground PM2.5 Concentration Using Generalized Additive Modeling. *Remote Sensing*, 9
101. Zou, B., Pu, Q., Bilal, M., Weng, Q., Zhai, L., & Nichol, J.E. (2016). High-Resolution Satellite Mapping of Fine Particulates Based on Geographically Weighted Regression. *Ieee Geoscience and Remote Sensing Letters*, 13, 495-499
